# Supplementary material for: Hybrid silica nanotubes with chiral walls
Source: Royal Society of Chemistry journal article supplement (doi:10.1039/b810517k), 2008-01-01
Supplement: b810517k.pdf [file b810517k.pdf]

## Hybrid silica nanotubes with chiral walls

Yuanli Chen,<sup>a</sup> Baozong Li,<sup>a</sup> Xiaojian Wu,<sup>a</sup> Xiulin Zhu,<sup>a</sup> Masahiro Suzuki,<sup>b</sup> Kenji Hanabusa<sup>b</sup> and Yonggang Yang<sup>a\*</sup>

<sup>a</sup>Key Laboratory of Organic Synthesis of Jiangsu Province, College of Chemistry and Chemical Engineering, Suzhou University, Suzhou 215123, P.R. China. <sup>b</sup>Department of Functional Polymer Science, Faculty of Textile Science and Technology, Shinshu University, Ueda 386-8567, Japan

E-mail: ygyang@suda.edu.cn

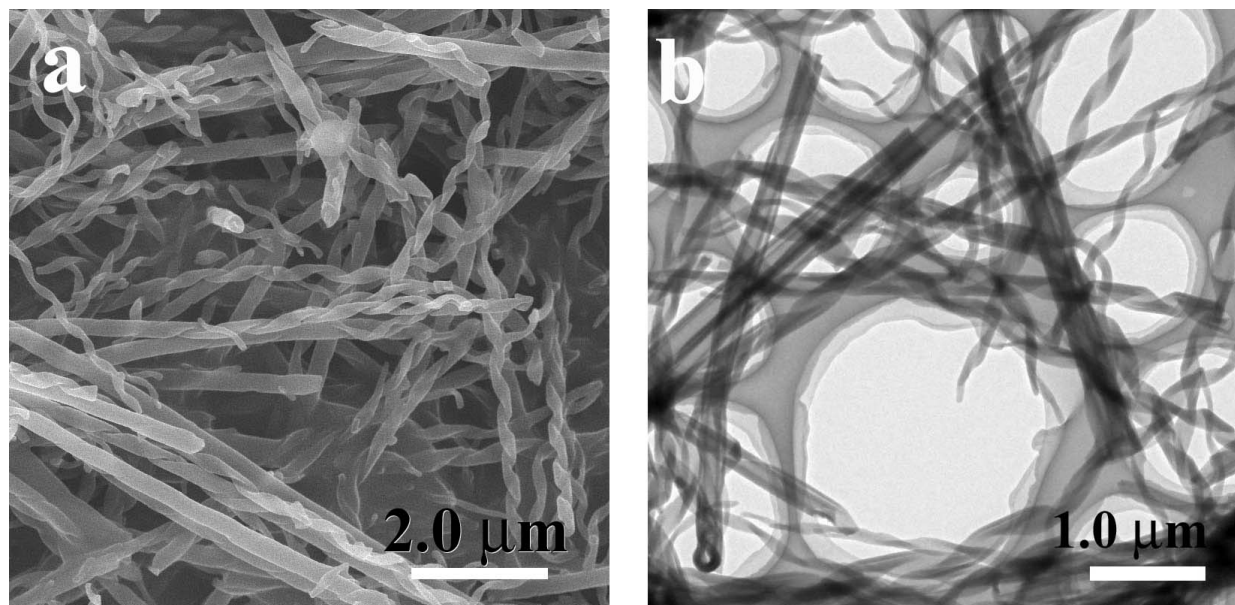

**Figure S1.** FESEM (a) and TEM (b) images of left-handedly coiled tubular ribbons and tube-in-tube structures.

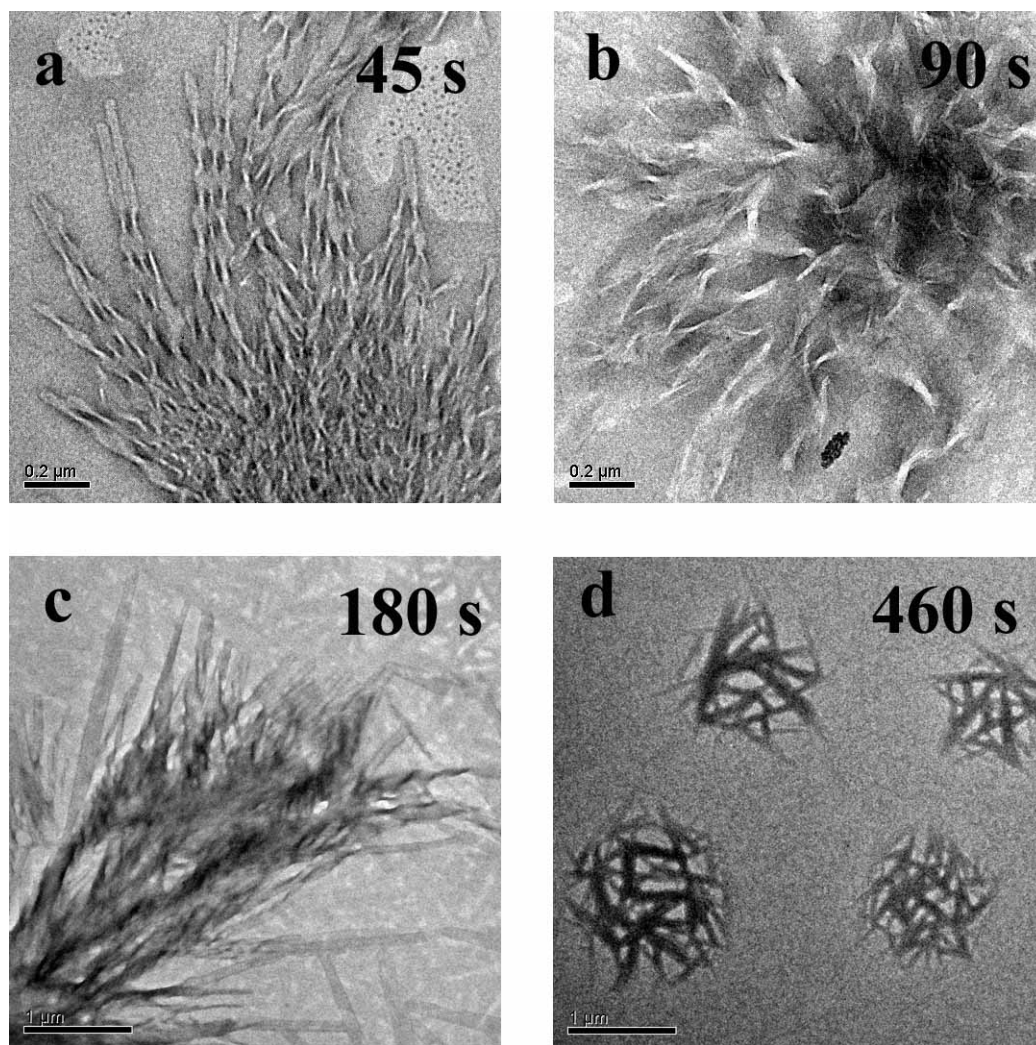

**Figure S2.** TEM images of the reaction mixture at different reaction time. (a) 45 s and (b) 90 s (Preparation condition: 20 mg of **12K**, 2.2 mL of H<sub>2</sub>O, 1.8 mL of EtOH, 40 mg of TMAPS); (c) 180 s and (d) 460 s (Preparation condition: 20 mg of **12K**, 2.2 mL of H<sub>2</sub>O, 1.8 mL of EtOH, 10 mg of 1-propylamine, and 30 mg of BTEB). Scale bar length: (a) and (b) are 0.2 μm; (c) and (d) are 1.0 μm.
